# Supplementary material
Source: HighWire-hosted journal article supplement (https://sti.bmj.com/content/99/5/303)
Supplement: inline-supplementary-material-1 [file inline-supplementary-material-1.pdf]

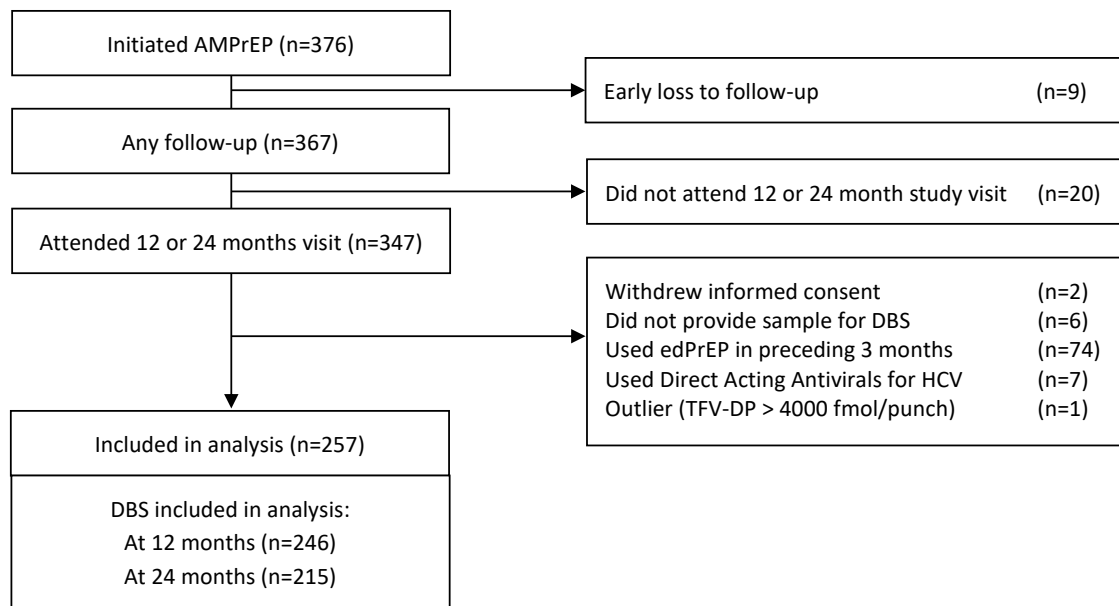

**Supplementary Figure:** Flow diagram of AMPrEP study participants included in analysis and reasons for exclusion. AMPrEP, Amsterdam, 2015-2018.

AMPrEP: Amsterdam PrEP demonstration project; DBS: dried blood spots; edPrEP: event-driven PrEP; HCV: hepatitis C virus infection; TFV-DP: tenofovir diphosphate concentration in DBS.
